# Supplementary material for: A novel CoFe2O4@Cr-MIL-101/Y zeolite ternary nanocomposite as a magnetically separable sonocatalyst for efficient sonodegradation of organic dye contaminants from water
Source: Royal Society of Chemistry journal article supplement (doi:10.1039/d0ra00877j), 2020-01-01
Supplement: d0ra00877j1.pdf [file d0ra00877j1.pdf]

## Supplementary information

### A novel $\text{CoFe}_2\text{O}_4@\text{Cr-MIL-101/Y}$ zeolite ternary nanocomposite as a magnetically separable sonocatalyst for efficient sonodegradation of organic dye contaminants from water

Meysam Sadeghi, Saeed Farhadi,\* and Abedin Zabardasti

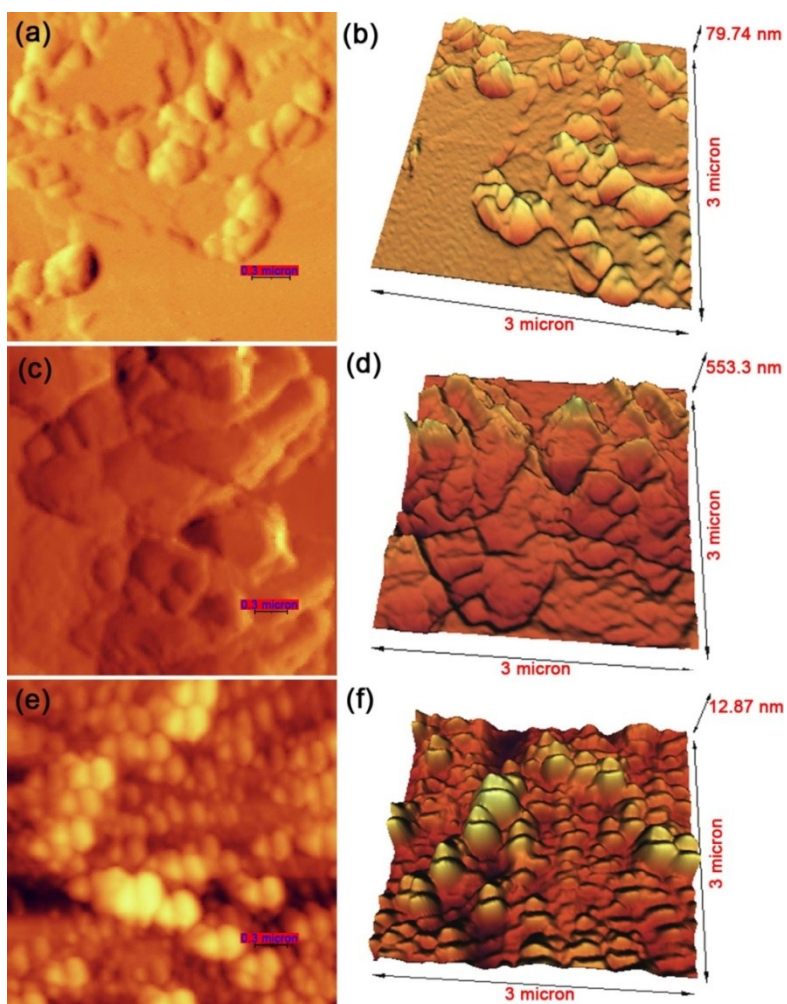

**Fig. S1.** AFM 2-dimensional (2D) and 3-dimensional (3D) images of the as-synthesized (a) and (b) raw Y zeolite, (c) and (d) Cr-MIL-101/Y, (e) and (f)  $\text{CoFe}_2\text{O}_4@\text{Cr-MIL-101/Y}$ .

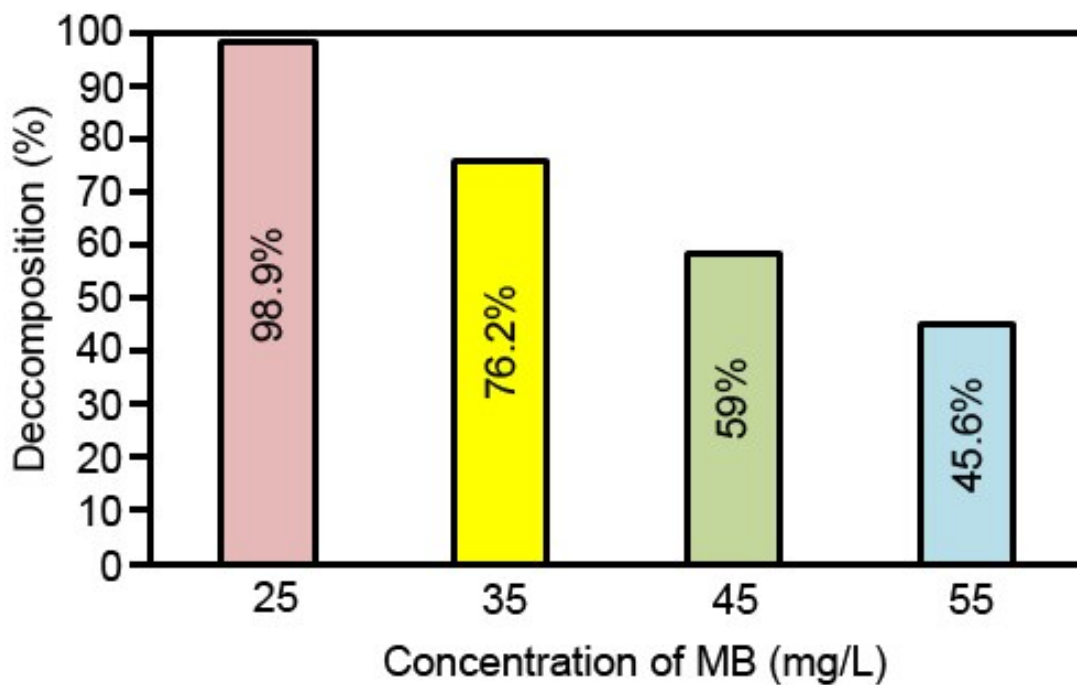

**Fig. S2.** Sonodecomposition process efficiency% ( $C_t/C_0$ ) of the MB dye over the  $\text{CoFe}_2\text{O}_4@\text{Cr-MIL-101/Y}$  catalyst nanocomposite as a function of the initial MB concentration (optimized experimental conditions; irradiation time: 60 min,  $[\text{H}_2\text{O}_2]$ : 40 mmol/L (2 mL), [catalyst dosage]: 0.5 g/L, pH: 7 and temperature:  $25\pm 1^\circ\text{C}$ ).

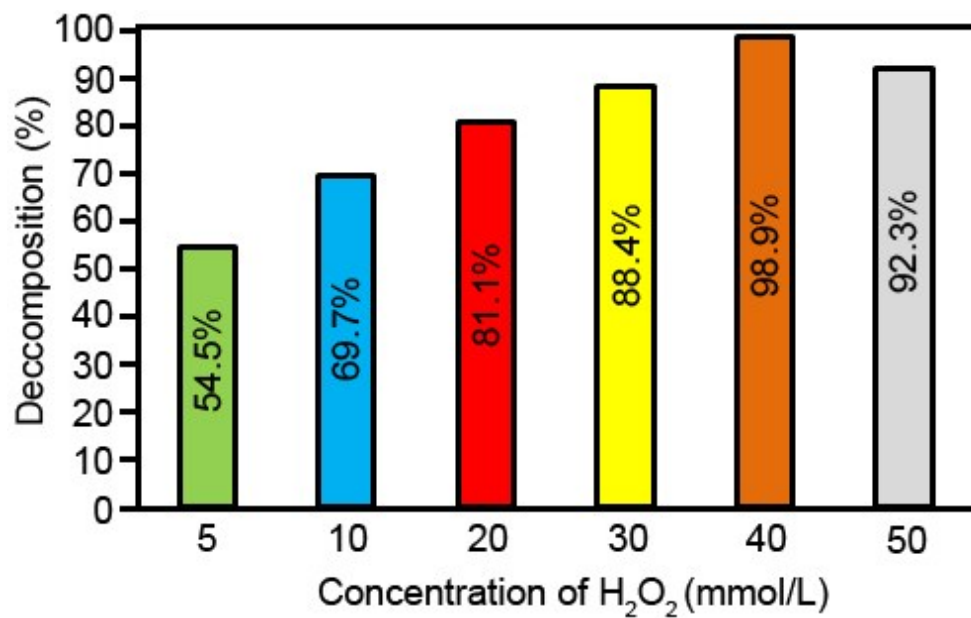

**Fig. S3.** The influence of the H<sub>2</sub>O<sub>2</sub> concentration on the sonodecomposition process of MB over the CoFe<sub>2</sub>O<sub>4</sub>@Cr-MIL-101/Y catalyst nanocomposite (optimized experimental conditions; irradiation time: 60 min, [MB]<sub>0</sub>: 25 mg/L (50 mL), [catalyst dosage]: 0.5 g/L, pH: 7 and temperature: 25±1°C).

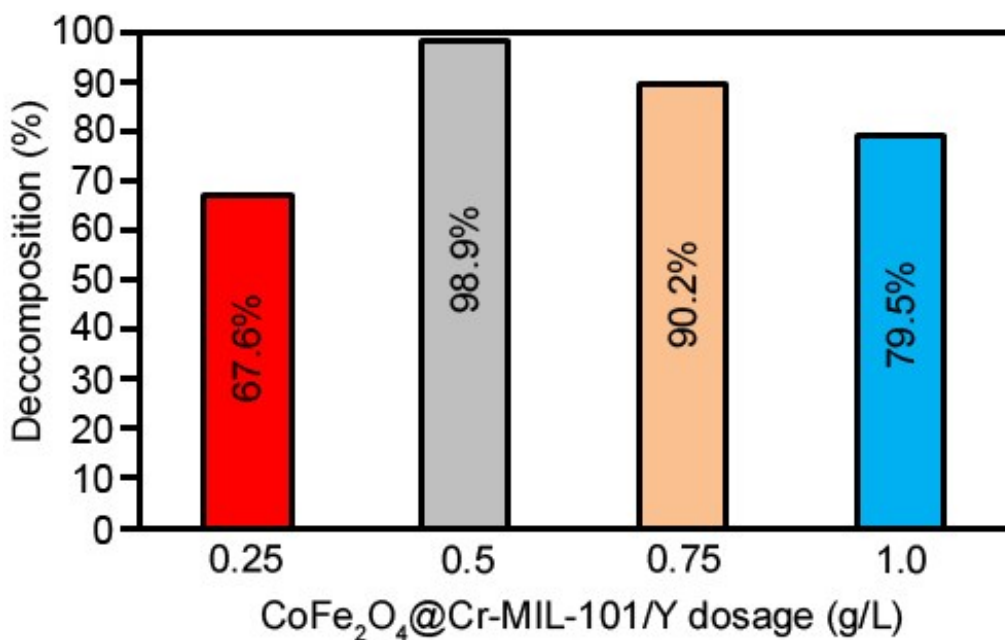

**Fig. S4.** The influence of the CoFe<sub>2</sub>O<sub>4</sub>@Cr-MIL-101/Y dosage on the sonodecomposition process of MB (optimized experimental conditions; irradiation time: 60 min, [MB]<sub>0</sub>: 25 mg/L (50 mL), [H<sub>2</sub>O<sub>2</sub>]: 40 mmol/L (2 mL), pH: 7 and temperature: 25±1°C).

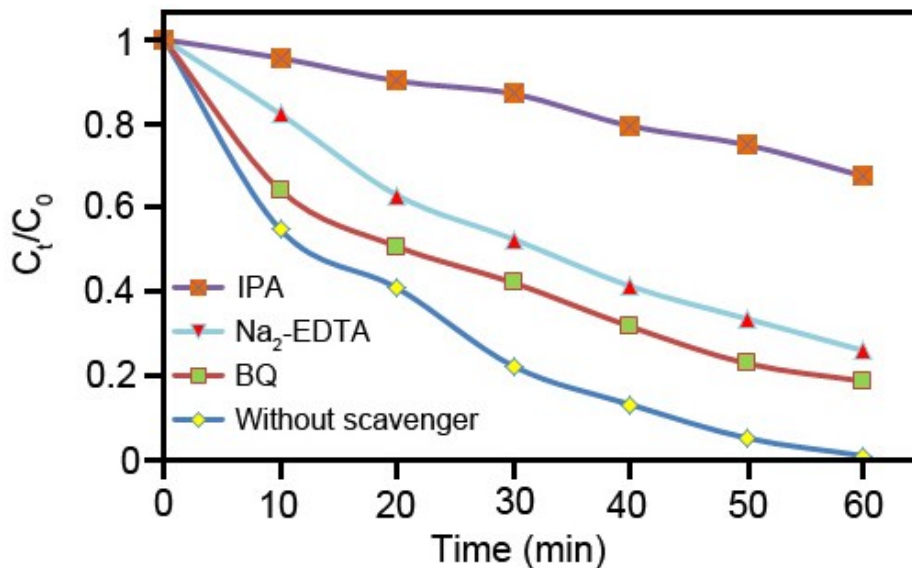

**Fig.S5.** The influence of the scavenger type on the sonodecomposition process of MB over the CoFe<sub>2</sub>O<sub>4</sub>@Cr-MIL-101/Y catalyst nanocomposite at different time intervals (optimized experimental conditions; [MB]<sub>0</sub>: 25 mg/L (50 mL), [H<sub>2</sub>O<sub>2</sub>]: 40 mmol/L (2 mL), [catalyst dosage]: 0.5 g/L, pH: 7 and temperature: 25±1°C).
